# Supplementary material for: A novel Ca/Mn-modified biochar recycles P from solution: mechanisms and phosphate efficiency
Source: Royal Society of Chemistry journal article supplement (doi:10.1039/d1em00511a), 2022-01-01
Supplement: d1em00511a1.pdf [file d1em00511a1.pdf]

**A novel Ca/Mn modified biochar recycles P from solution:  
mechanisms and phosphate efficiency**

Chengwei Wang<sup>a,b1</sup>, Cheng Qiu<sup>c1</sup>, Zhengguo Song<sup>b</sup>, Minling Gao<sup>b\*</sup>

<sup>a</sup>School of Environmental Science and Engineering, Tianjin Polytechnic University,  
No. 399 Binshui West Road, Xiqing District, Tianjin 300387, China

<sup>b</sup>Department of Civil and Environmental Engineering, Shantou University, No 243  
Daxue Road, Shantou, Guangdong Province, 515063, China

<sup>c</sup>Institute of Agricultural Product Quality Standard and Testing Research, Tibet  
Academy of Agricultural and Animal Husbandry Sciences, Lhasa Tibet 850032,  
China

\*Corresponding author: Minling Gao

E-mail: kyforever2013@163.com

1 Chengwei Wang and Cheng Qiu contributed equally to the work and should be  
regarded as co-first authors.

## 1. Materials and methods

### 1.1 Effects of coexisting anions strength

Analysis of different coexisting ions strength on phosphate (P) adsorption, 0.1, 0.01 M and 0.001 M NaNO<sub>3</sub> were applied to prepare different initial P concentrations (0-75 mg·L<sup>-1</sup>) to explore the effect of anions on P removal. The adsorbents (each with 0.08 g) were added into the phosphate solutions before shaken at 120 rpm for 24 h.

### 1.2 Adsorption thermodynamics

The adsorption was performed at the temperature of 15, 25 °C and 35 °C respectively for thermodynamic analysis. The sorption process is same as the isothermal adsorption experiment (adding 0.1 g biochar into 40 mL brown glass bottles that contain 20 mL various initial phosphate concentrations (1-75 mgP·L<sup>-1</sup>). The equilibrium phosphate concentrations were determined via ultraviolet spectrophotometer.

### 1.3 Stability analysis of CMBC

0.2 g of the modified biochar (CM<sub>1</sub>BC) was added to 20.0 mL solution containing 20.0 mL DI water solution set at various pH values (pH:3, 4, 5, 6, 7, and 8) in brown glass bottles and shaken at 120 rpm (end to end) at an ambient temperature for 24 h. Then, the Subsequently, the suspension was filtered and measured. The phosphate desorption ratio was calculated following Eq.(10):

$$\text{dissolved amounts} = \frac{C_e \times V}{M} \times 1000 \quad (10)$$

where  $C_e$  (mg/L) is the equilibrium concentration of Mn/Ca in the solution.  $V$  (mL) is the volume of water, and  $M$  (g) is the mass of the CMBC.

## 2. Results and discussion

### 2.1. Effect of coexisting ionic strength

Coexisting ions in natural, agricultural or industrial wastewaters may affect the P adsorption capacity due to the coulombic forces or competing adsorption sites. Thus,

it is imperative to explore effects of the coexisting ionic strength on P adsorption. As shown in Fig. S8, the initial P and NO<sub>3</sub><sup>-</sup> concentrations are ranged between 0 mg·L<sup>-1</sup> to 75 mg·L<sup>-1</sup> and 0.001 to 0.1 M, respectively, while mass of the modified biochars (CBC, MBC, CM<sub>1</sub>BC and CM<sub>2</sub>BC) added in the solutions are 4 g·L<sup>-1</sup>. It is observed that 0.001 and 0.01 M NO<sub>3</sub><sup>-</sup> have little effect on P adsorption on the four modified adsorbents. In the presence of 0.1 M NO<sub>3</sub><sup>-</sup>, there is a relatively small drop in the P adsorption capacity of the CBC and MBC in this study, which agree with previous observations where La modified vermiculites materials and calcium-activated biochar were used on P adsorption (Huang et al., 2014; Liu et al., 2019). However, the P adsorption capacity of the CM<sub>1</sub>BC and CM<sub>2</sub>BC decline, but these adsorbents still show a remarkable P sorption capacity when the concentration of NO<sub>3</sub><sup>-</sup> reached 0.1 M.

## 2.2 Thermodynamic study

Fig.S9 shows, the P adsorption capacity increased with the increase of the sorption temperatures from 15°C to 35 °C, which imply that higher temperature has a positive effect on P adsorption capacity.

To further evaluate the stability and feasibility of the phosphate adsorption on the adsorbents, three thermodynamic parameters such as Gibbs free energy ( $\Delta G^0$ ), enthalpy ( $\Delta H^0$ ) and entropy ( $\Delta S^0$ ) were calculated by the Eq. (10) and (11):

$$\Delta G^0 = -RT \ln K_L \quad (10)$$

$$\Delta G^0 = \Delta H^0 - T\Delta S^0 \quad (11)$$

where R is the universal gas constant (8.314 J·mol<sup>-1</sup>·K<sup>-1</sup>), T is the absolute temperature (K), and K<sub>L</sub> (L·mol<sup>-1</sup>) represents the Langmuir adsorption characteristic constant.

The corresponding thermodynamic parameters are shown in Table S4. The CM<sub>1</sub>BC for an example, the change in negative values of the  $\Delta G^0$  reveal that the phosphate adsorption on CBC, MBC, CM<sub>1</sub>BC and CM<sub>2</sub>BC were a spontaneous process (Table S4). When the temperature is raised from 15 to 35 °C, there is a drop of  $\Delta G^0$  from -23.57 kJ·mol<sup>-1</sup> to -28.40 kJ·mol<sup>-1</sup>, which showed that the spontaneity increases with the increase of temperatures. The positive value of  $\Delta H^0$  (56.61 kJ·mol<sup>-1</sup>) indicates that

the phosphate adsorption on the CM<sub>1</sub>BC sample was an endothermic process, and the adsorbents would possess higher phosphate adsorption with the increasing temperature (Ajmal et al., 2020). Moreover, the higher temperature may increase the diffusion of phosphate ions in solution and enhance the probability of phosphate collision between the active sites and the phosphate ions (Liu et al., 2019). Additionally, the positive value of  $\Delta S^0$  (0.241 kJ·mol<sup>-1</sup>·K<sup>-1</sup>) elucidates that the randomness of adsorbent-liquid interface increased during the phosphate sorption process with the increase of temperature. The thermodynamic parameters analysis of other adsorbents such as CBC, MBC and CM<sub>2</sub>BC agree with CM<sub>1</sub>BC (Table S4).

### 2.3 Stability analysis of CMBC

In order to investigate the stability and potential risk of the adsorbed material, the amount of Ca and Mn released from CMBC was measured in different pH solutions. It can be seen in Fig S10, at low pH values (3.0-5.0) the amount of Ca, Mn released was found to be in the range of 8.6 - 14.4  $\mu\text{g}\cdot\text{g}^{-1}$  and 1.4 to 3.3  $\mu\text{g}\cdot\text{g}^{-1}$ . Under acidic conditions, Ca, Mn were more readily released, but the overall dissolved amounts were relatively low (Ca: < 15  $\mu\text{g}\cdot\text{g}^{-1}$ ; Mn < 4  $\mu\text{g}\cdot\text{g}^{-1}$ ). The dissolution of Ca and Mn is further reduced as pH > 5.0 (Ca: < 7  $\mu\text{g}\cdot\text{g}^{-1}$ ; Mn < 1  $\mu\text{g}\cdot\text{g}^{-1}$ ). These results indicated that CMBC possesses good stability and relatively low risk.

### References:

- Ajmal, Z., Muhmood, A., Dong, R., et al., 2020 Probing the efficiency of magnetically modified biomass-derived biochar for effective phosphate removal[J]. *J. Environ. Manage.* 253, 109730.
- Huang, W.Y., Li, D., Liu, Z.Q., et al., 2014. Kinetics, isotherm, thermodynamic, and adsorption mechanism studies of La(OH)<sub>3</sub>-modified exfoliated vermiculites as highly efficient phosphate adsorbents[J]. *Chem. Eng. J.* 236, 191-201.

Liu, X.N., Shen, F., Qi, X.H., 2019. Adsorption recovery of phosphate from aqueous solution by CaO-biochar composites prepared from eggshell and rice straw[J]. Sci. Total Environ. 666, 694-702.

**Table S1** The basic physicochemical characteristics of soil

| Available phosphorus ( $\text{mg}\cdot\text{kg}^{-1}$ ) | Available potassium ( $\text{mg}\cdot\text{kg}^{-1}$ ) | Total nitrogen (%) | Organic matter (%) | pH   |
|---------------------------------------------------------|--------------------------------------------------------|--------------------|--------------------|------|
| 10.4                                                    | 200.0                                                  | 0.195              | 3.94               | 6.25 |

**Table 2** Langmuir, Freundlich and Sips equation parameters of phosphate adsorption onto different biochar

| Adsorbents         | Langmuir                                   |                                            |        |       | Freundlich |       |       | Sips                                       |                                           |          |       |
|--------------------|--------------------------------------------|--------------------------------------------|--------|-------|------------|-------|-------|--------------------------------------------|-------------------------------------------|----------|-------|
|                    | $Q_m$<br>( $\text{mg}\cdot\text{g}^{-1}$ ) | $K_L$<br>( $\text{L}\cdot\text{mg}^{-1}$ ) | $R_L$  | $R^2$ | $1/n$      | $K_F$ | $R^2$ | $Q_m$<br>( $\text{mg}\cdot\text{g}^{-1}$ ) | $K_s$<br>( $\text{L}\cdot\text{g}^{-1}$ ) | $\gamma$ | $R^2$ |
| CBC                | 9.15                                       | 1.38                                       | 0.0096 | 0.988 | 0.26       | 4.07  | 0.88  | 9.20                                       | 1.35                                      | 0.97     | 0.986 |
| MBC                | 3.19                                       | 0.30                                       | 0.0430 | 0.989 | 0.18       | 1.43  | 0.87  | 3.53                                       | 0.22                                      | 0.78     | 0.991 |
| CM <sub>1</sub> BC | 15.58                                      | 1.21                                       | 0.0109 | 0.978 | 0.16       | 8.81  | 0.93  | 17.23                                      | 1.03                                      | 0.64     | 0.984 |
| CM <sub>2</sub> BC | 20.84                                      | 0.68                                       | 0.0192 | 0.988 | 0.28       | 8.84  | 0.92  | 19.68                                      | 0.83                                      | 0.95     | 0.992 |

**Table S3** The maximum phosphate sorption capacities reported in the references via different sorbents

| Adsorbents                                    | pH   | Q <sub>m</sub> (mg P·g <sup>-1</sup> ) | References               |
|-----------------------------------------------|------|----------------------------------------|--------------------------|
| Ca-Mn impregnated biochar                     | ≈6.5 | 20.8                                   | This study               |
| Mg-modified dealbata biochar                  | 7    | 9.0                                    | Cui et al., 2016         |
| Fe-activated carbon                           | 6.5  | 10.8                                   | Kumar et al., 2017       |
| La-modified carbon                            | -    | 13.3                                   | Koilraj et al.,2017      |
| Fe-Mn oxide                                   | 7    | 18.4                                   | Du et al.,2017           |
| Ca(OH) <sub>2</sub> -modified natural zeolite | 7    | 8.8                                    | Mitrogiannis et al.,2017 |
| Eggshell biochar                              | -    | 32.6                                   | Kose et al.,2011         |

**Table S4** Thermodynamic parameters for phosphate adsorption on different adsorbents

| Adsorbents         | Temperature(K) | $\Delta G^0$ (kJ/mol) | $\Delta H^0$ (kJ/mol) | $\Delta S^0$ (kJ/(mol·K)) |
|--------------------|----------------|-----------------------|-----------------------|---------------------------|
| CBC                | 288.15         | -24.05                | 59.68                 | 0.291                     |
|                    | 298.15         | -26.96                |                       |                           |
|                    | 308.15         | -29.86                |                       |                           |
| MBC                | 288.15         | -19.33                | 56.610                | 0.264                     |
|                    | 298.15         | -21.97                |                       |                           |
|                    | 308.15         | -24.60                |                       |                           |
| CM <sub>1</sub> BC | 288.15         | -23.57                | 45.90                 | 0.241                     |
|                    | 298.15         | -25.98                |                       |                           |
|                    | 308.15         | -28.40                |                       |                           |
| CM <sub>2</sub> BC | 288.15         | -22.55                | 41.18                 | 0.221                     |
|                    | 298.15         | -24.76                |                       |                           |
|                    | 308.15         | -26.97                |                       |                           |



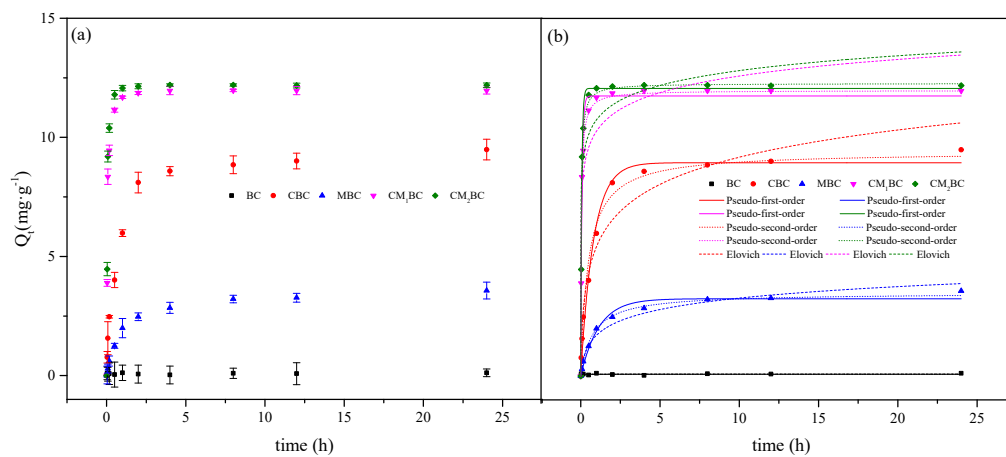

Fig. S1. Adsorption kinetics of phosphate onto pristine biochar and modified adsorbents.

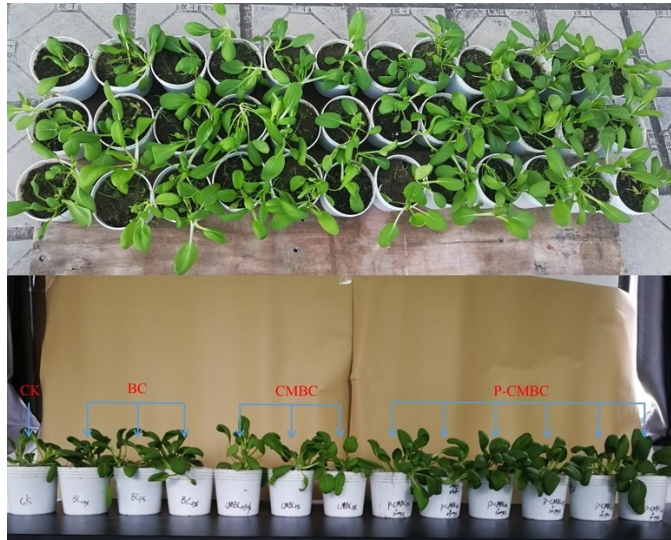

Fig.S2 Effects of different usage of BC/CMBC/P-CMBC on rape seedling growth

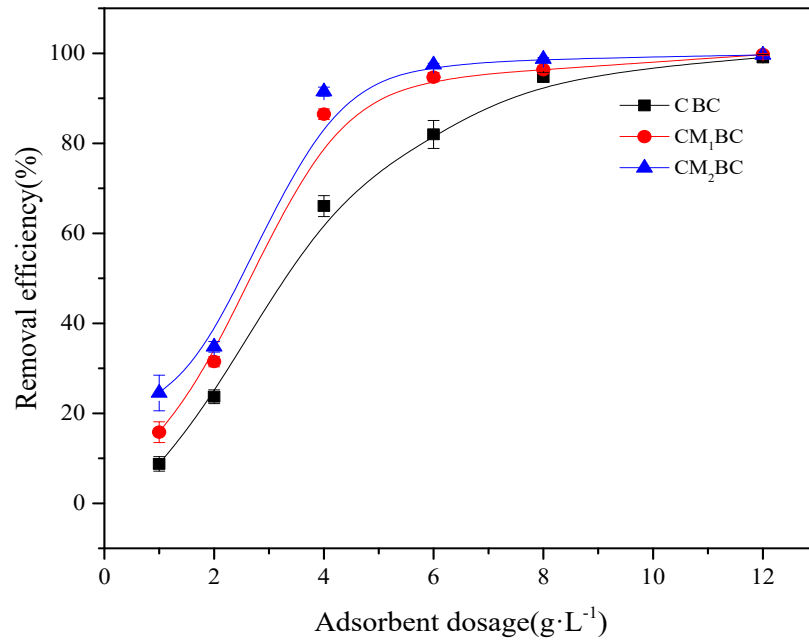

Fig.S3. Effects of adsorbent dosage on phosphate sorption capacity by CBC, CM<sub>1</sub>BC, and CM<sub>2</sub>BC

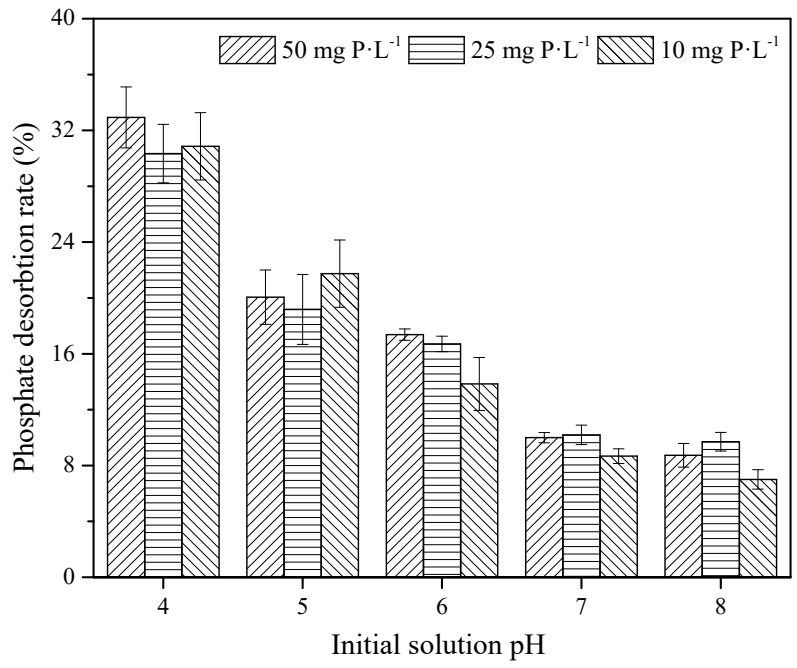

Fig. S4. Phosphate desorption by meas of DI water in various pH

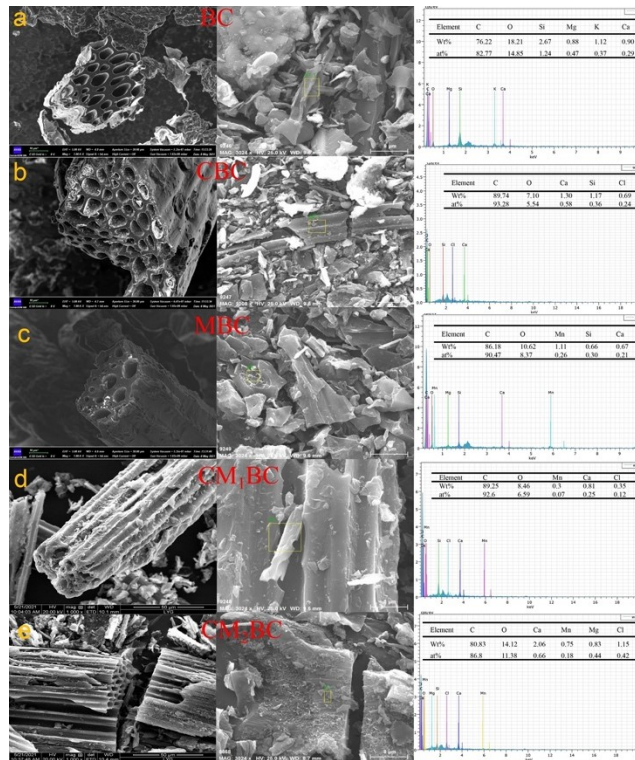

Fig.S5.SEM images and EDS spectra of (a) BC, (b) CBC, (c) MBC,(d) CM<sub>1</sub>BC, (e) CM<sub>2</sub>BC

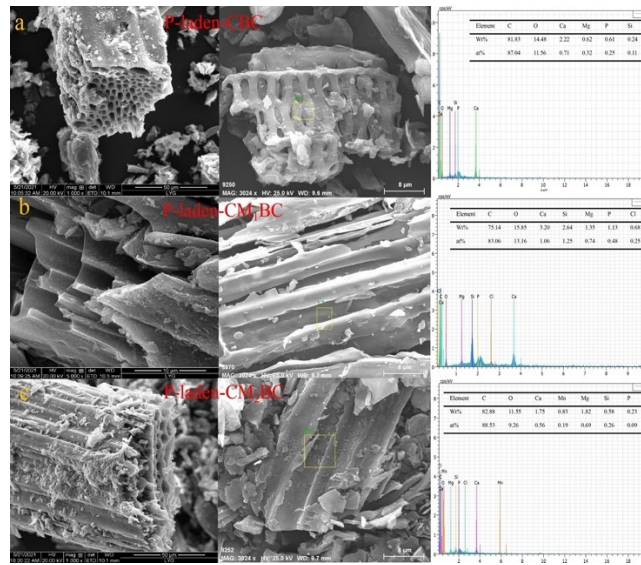

Fig.S6. SEM images and EDS spectra of (a) P-laden-CBC, (b) P-laden-CM<sub>1</sub>BC, (c) P-laden-CM<sub>2</sub>BC

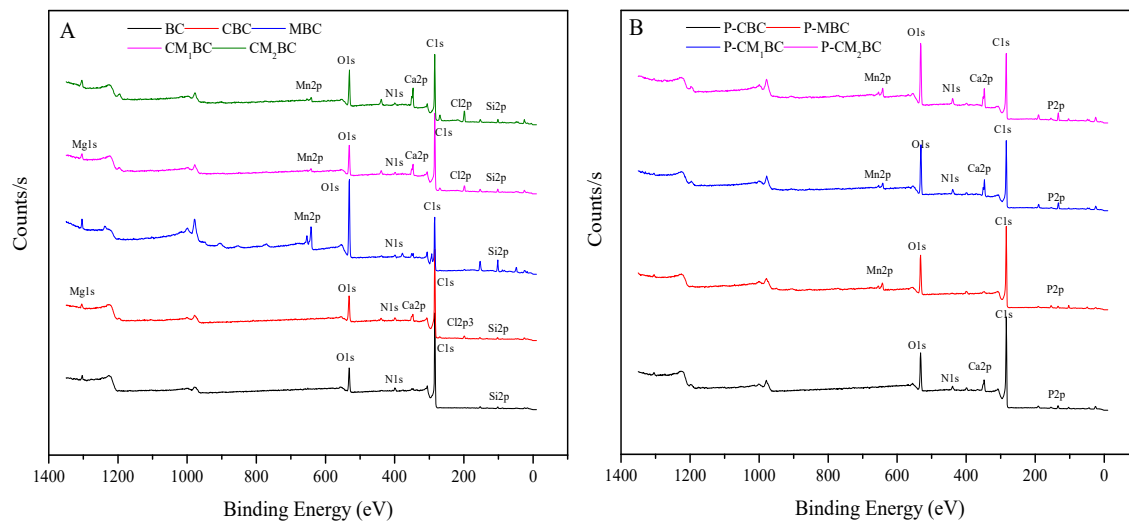

Fig. S7. Pristine biochar and modified adsorbents before or after phosphate sorption: (A) BC, CBC, MBC, CM<sub>1</sub>BC, and CM<sub>2</sub>BC; (B) P-CBC, P-MBC, P-CM<sub>1</sub>BC, and P-CM<sub>2</sub>BC

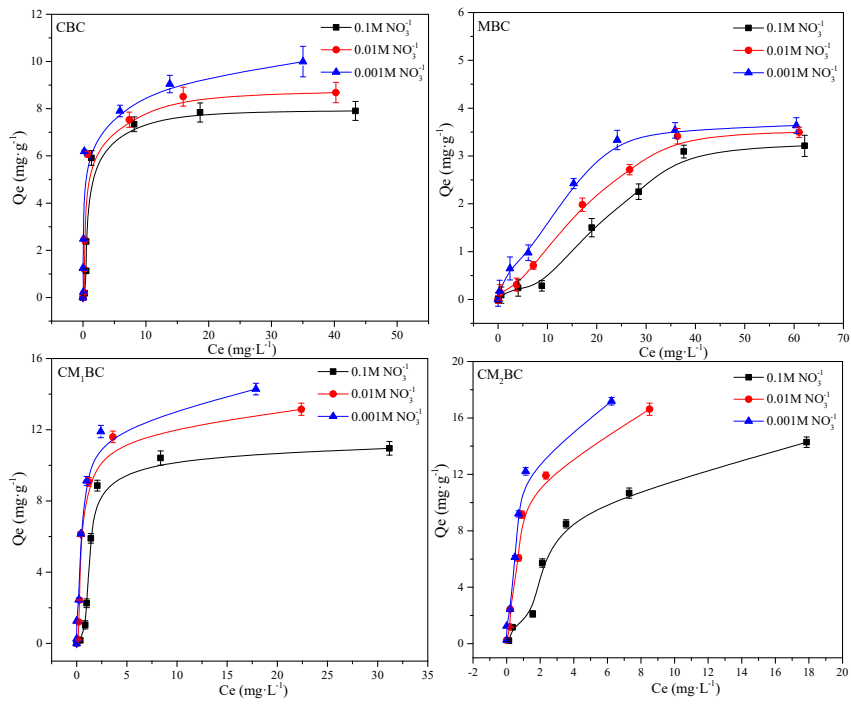

Fig. S8. Effect of coexisting ionic strength on the removal of phosphate by modified adsorbents



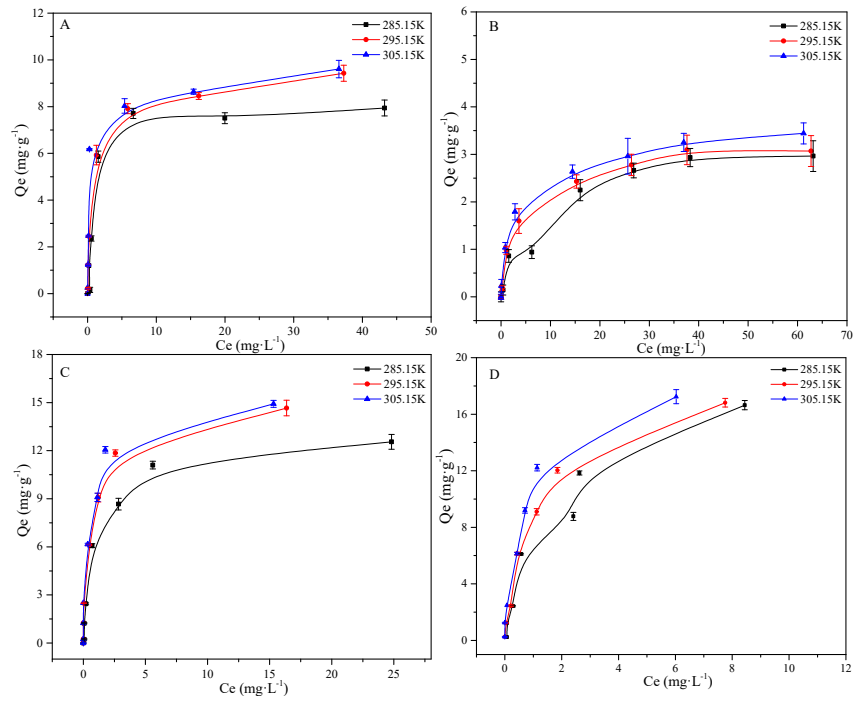

Fig. S9. Effect of various temperatures on the removal of phosphate by different adsorbents:(A)CBC; (B)MBC; (C) $\text{CM}_1\text{BC}$ ; (D) $\text{CM}_2\text{BC}$

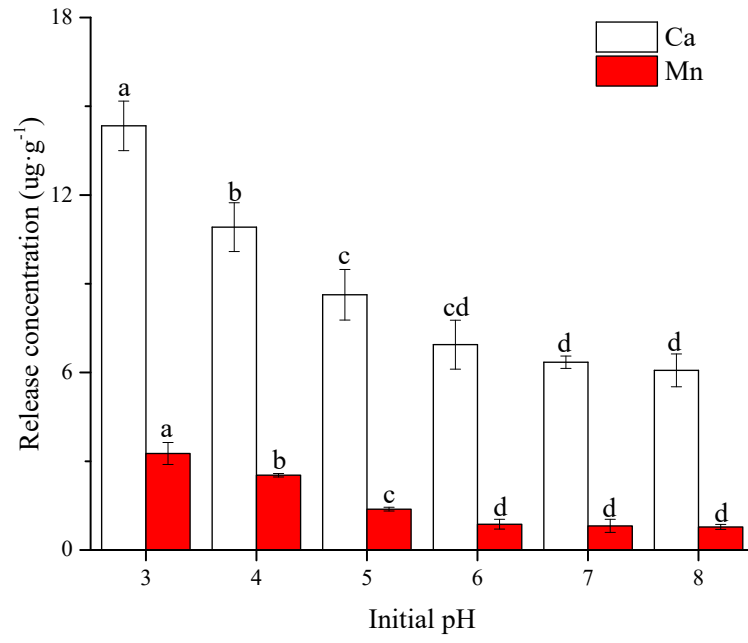

Fig. S10. The concentrations of Ca and Mn in various pH
